# Supplementary material for: The use of chemical actinometry for the evaluation of the light absorption efficiency in scattering photopolymerizable miniemulsions
Source: Royal Society of Chemistry journal article supplement (doi:10.1039/c4pp00323c), 2014-10-10
Supplement: c4pp00323c1.pdf [file c4pp00323c1.pdf]

## Electronic Supplementary Information

### The use of chemical actinometry for the evaluation of light absorption efficiency in scattering photopolymerizable miniemulsions

Marta Penconi,<sup>a</sup> Emeline Lobry,<sup>b</sup> Florent Jasinski,<sup>b</sup> Abraham Chemtob,<sup>b</sup> Céline Croutxé-Barghorn,<sup>b</sup> Adrien Criqui,<sup>c</sup> André M. Braun,<sup>d</sup> Esther Oliveros\*<sup>a</sup>

### Supplementary Figure

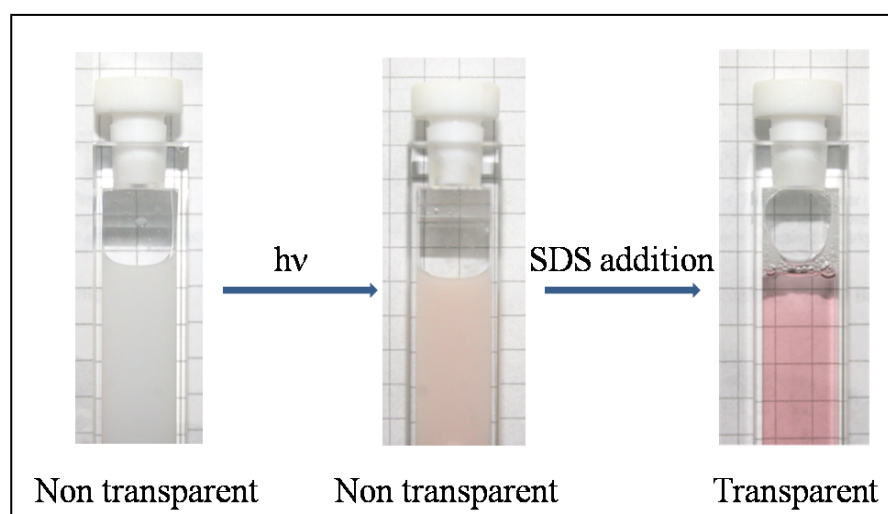

**Figure S1** Example of non transparent miniemulsion based on a mixture of monomers (MM) and containing the actinometer (DFIS), before and after irradiation at 367 nm, and transparent pseudo-microemulsion (PM) obtained by addition of an aqueous solution of SDS (200 g L<sup>-1</sup>).

## Supplementary Table

**Table S1** Composition in weight percent (SDS, organic phase + octadecyl acrylate [ $\phi_{\text{org}}(\text{MM}) + \text{OA}$ ] and water) of pseudo-microemulsions (PM) obtained from corresponding MM based miniemulsions (see Table 3 for the composition of the miniemulsions and droplet sizes).

| PM | % SDS | % $\phi_{\text{org}}(\text{MM}) + \text{OA}$ | % water |
|----|-------|----------------------------------------------|---------|
| S3 | 11.80 | 0.89                                         | 87.31   |
| S6 | 11.82 | 1.78                                         | 86.40   |
| L3 | 11.80 | 0.88                                         | 87.32   |
| L6 | 11.81 | 1.77                                         | 86.42   |
